# Supplementary material for: Spatiotemporal Patterns and Determinants of Undernutrition Among Late Adolescent Girls in Ethiopia Using Ethiopian Demographic and Health Surveys 2000 to 2016: Spatiotemporal and Multilevel Approach.
Source: Research Square preprint supplement (doi:10.21203/rs.3.rs-141031/v1), 2021-01-15
Supplement: Supplementary file 1 [file 8e2a6f937c77dbe36481a53b.docx]

Table 4: The regional variation of under-nutrition among late adolescent girls over time in Ethiopia (EDHS 2000-2016)

| Sr. No | Region | EDHS 2000 | | EDHS 2005 | | EDHS 2011 | | | EDHS 2016 | |
| --- | --- | --- | --- | --- | --- | --- | --- | --- | --- | --- |
| Under-nutrition% | Not under-nutrition% | Under-nutrition% | Not under-nutrition% | under-nutrition% | Not under-nutrition% | | under-nutrition% | Not under-nutrition% |
|  | Tigray | 42.55 | 57.45 | 46.43 | 53.57 | 52.31 | 47.69 | | 43.31 | 56.01 |
|  | Afar | 38.93 | 61.07 | 46.34 | 53.66 | 46.74 | 53.26 | | 42.99 | 57.01 |
|  | Amhara | 42.72 | 57.28 | 37.87 | 62.13 | 44.86 | | 55.14 | 34.32 | 65.68 |
|  | Oromia | 31.93 | 68.07 | 25.43 | 74.57 | 30.11 | | 69.89 | 26.58 | 73.42 |
|  | Somali | 54.64 | 45.36 | 57.39 | 42.61 | 42.48 | | 57.52 | 45.14 | 54.86 |
|  | Ben. Gumuz | 48.16 | 51.84 | 34.18 | 65.82 | 30.27 | | 6973 | 20.78 | 79.22 |
|  | SNNPR | 40.94 | 59.06 | 27.13 | 72.87 | 24.33 | | 75.67 | 17.37 | 82.63 |
|  | Gambela | 35.84 | 64.16 | 31.36 | 68.64 | 26.08 | | 73.92 | 38.29 | 61.71 |
|  | Harari | 33.47 | 66.33 | 21.95 | 78.05 | 31.12 | | 68.88 | 29.35 | 79.65 |
|  | Addis Ababa | 23.28 | 76.72 | 18.15 | 81.85 | 21.25 | | 78.75 | 20.35 | 79.54 |
|  | Dire Dawa | 34.95 | 65.05 | 37.50 | 62.50 | 29.22 | | 70.78 | 28.46 | 71.54 |
|  | Total | 36.79 | 63.21 | 30.86 | 69.14 | 34.82 | | 65.18 | 28.22 | 71.78 |

Table 5: Significant clusters of SaTScan analysis for under-nutrition among late adolescent girls in Ethiopia, EDHS 2000 to 2016

| Year |  | Cluster | Significant EAs (clusters) detected | Coordinates  /Radius | Population | Cases | RR | LLR | P-value |
| --- | --- | --- | --- | --- | --- | --- | --- | --- | --- |
| 2000 |  | Primary | 11, 29, 12, 14, 22, 28, 23, 13, 30, 21, 45, 16, 25, 27, 19, 49, 33, 46, 50, 18, 20, 31, 15, 47, 17, 26, 34, 24, 32, 35, 6, 37, 2, 1, 44, 36, 38, 145, 48, 4, 40, 84, 39, 42, 5, 43, 7, 146, 41, 85, 87, 10, 102, 8, 9, 92, 93, 103, 104, 88, 105, 108, 97, 86, 94, 153, 106, 95, 96, 89, 111, 90, 3, 154, 98, 99, 155, 101, 109, 151, 91, 112, 110, 156, 100, 159, 58, 59, 116, 60, 61, 82, 114, 128, 129, 115, 138, 140, 67, 158, 68, 81, 139, 66, 113, 130, 73, 117, 51, 55, 70, 150, 69, 54, 137, 52, 123, 119, 71, 72, 53, 56 | 13.883741 N, 39.162985 E / 364.77 km | 682 | 314 | 1.31 | 13.46 | <0.001 |
|  | Secondary | 250, 252, 251, 249, 248, 272, 273, 258, 253, 218, 425, 259, 506, 426, 424, 422 | 9.506756 N, 42.621090 E / 51.27 km | 82 | 52 | 1.73 | 11.69 | <0.01 |
|  | Tertiary | 321, 176, 315, 322, 320, 316, 323, 325, 191, 192, 377, 317, 175, 319, 318 | 8.245203 N, 37.785581 E / 74.06 km | 106 | 62 | 1.59 | 10.03 | <0.05 |
| 2005 |  | Primary | 268, 303, 123, 337, 177, 540, 116, 450, 433, 527, 150, 335, 42, 207, 384, 348, 448, 109, 205, 346, 423, 39, 64, 162, 388, 401, 200, 530, 180, 36, 76, 188, 259, 72, 203, 195 | 14.108312 N, 38.288215 E/ 134.64 km | 121 | 64 | 1.79 | 13.02 | <0.001 |
| 2011 |  | Primary | 191, 433, 66, 65, 133, 231, 543, 79, 469, 542, 480, 418, 224, 106, 445, 579, 463, 69, 225, 597, 296, 99, 71, 67, 226, 397, 617, 280, 322, 318, 84, 21, 482, 600, 538, 461, 164, 68, 417, 582, 235, 319, 246, 419, 589, 414, 493, 300, 510, 177, 192, 478, 241, 245, 260, 215, 287, 293, 615, 568, 497, 62, 372, 392, 311, 499, 171, 638, 512, 314, 247, 636, 533, 467, 498, 551, 366, 403, 515, 555, 604, 131, 33, 601, 195, 299, 643, 504, 521, 46, 488, 50, 217, 347, 420, 86, 577, 556, 407, 406, 35, 180, 462, 123, 119, 271, 174, 423, 334, 89, 139, 634, 20, 85, 249, 26, 219, 1, 181, 255, 77, 227, 421, 333, 388, 213, 148, 621, 557 | 12.635948 N, 40.297925 E / 308.64 km | 880 | 466 | 1.71 | 67.07 | <0.001 |
| 2016 |  | Primary | 599, 544, 488, 344, 249, 348, 332, 241, 128, 130, 442, 427, 172, 389, 511, 79, 351, 97, 455, 449, 200, 189, 143, 571, 421, 205, 136, 191, 178, 499, 300, 392, 160, 585, 384, 496, 570, 478, 605, 235, 334, 550, 237, 94, 220, 401, 368, 424, 99, 298, 127, 611, 623, 254, 410, 362, 542, 538, 66, 591, 440, 632, 345, 196, 430, 596, 55, 263, 18, 129, 4, 134, 575, 226, 341, 547, 366, 75, 354, 192, 117, 355, 616, 579, 604, 276, 404, 617, 598, 103, 481, 199, 620, 461, 545, 627, 45, 156, 413, 628, 551, 425, 636, 84, 283, 81, 89, 590, 37, 400, 38, 460, 597, 80, 479, 135, 188, 176, 102, 340, 152, 310, 132, 584, 637, 327, 181, 322, 312, 10, 336, 267, 512, 295, 163, 456, 98, 255, 528, 39, 206, 120, 640, 158, 258, 484, 583 | 12.569937 N, 40.396640 E / 322.17 km | 787 | 368 | 1.77 | 54.45 | <0.001 |
|  | Secondary | 104, 260, 592, 507, 233, 69, 370, 426, 603, 346, 315, 536, 309, 567, 343, 266, 105, 106, 13, 221, 549, 417, 231, 291, 47, 469, 265, 63,114, 284, 593, 219, 270, 446 | 8.309769 N, 33.805118 E / 105.98 km | 129 | 70 | 1.78 | 14.92 | <0.001 |
|  |  | Tertiary | 138, 164, 85, 358, 146, 492, 92, 490, 543, 171, 198, 95, 318, 77, 187, 497, 556, 520, 629, 521, 588, 553, 458, 480, 208, 214, 251, 573 | 5.589269 N, 44.175032 E / 355.80 km | 134 | 68 | 1.66 | 11.19 | <0.01 |

Table 8: Multilevel analysis of factors associated with late adolescent girls’ under-nutrition in Ethiopia, from EDHS 2016 data source

| Sr.No. | Variables | | Under-nutrition % | | Model- I  Null model | Model-II: Level –I  AOR, (95%CI) | Model-III: Level-2  AOR, (95%CI) | Model-IV: L1 & L2  AOR, (95%CI) |
| --- | --- | --- | --- | --- | --- | --- | --- | --- |
| **Yes** | **No** |
| 1. **Individual level factors** | | | | | | | |
|  | Adolescent age: | 15-17 years | 34.30 | 65.70 |  | 1.00 |  | 1.00 |
| 18-19 years | 18.90 | 81.10 |  | 0.42, (0.32 - 0.55) *** |  | 0.43, (0.35 - 0.53) *** |
|  | Religion: | Orthodox | 31.19 | 68.81 |  | 1.00 |  | 1.00 |
| Catholic | 5.33 | 94.67 |  | 0.14, (0.03 - 0.73) * |  | 0.25, (0.03 - 2.05) |
| Protestant | 23.07 | 76.93 |  | 0.60, (0.41 - 0.89) * |  | 1.18, (0.81 - 1.70) |
| Muslim | 28.17 | 71.83 |  | 0.85, (0.64 - 1.13) |  | 1.05, (0.76 - 1.46) |
| Others | 51.68 | 48.32 |  | 1.72, (0.47 - 6.31) |  | 3.56, (0.96 - 13.20) |
|  | Late Adolescent girls’ educational status | No education | 27.23 | 72.77 |  | 1.00 |  | 1.00 |
| Primary | 30.19 | 69.81 |  | 1.18, (0.81 - 1.72) |  | 1.32 (0.95 – 1.83) |
| Secondary | 21.12 | 78.88 |  | 0.91, (0.55 - 1.49) |  | 0.92, (0.60 - 1.40) |
| Higher | 40.35 | 59.65 |  | 4.07, (1.53 -10.81) ** |  | 4.50, (2.33 – 8.69) *** |
|  | Marital status of adolescent girls | Never married | 29.79 | 70.21 |  | 1.00 |  | 1.00 |
| Married | 23.73 | 76.27 |  | 1.01, (0.65 - 1.59) |  | 0.94, (0.69 - 1.29) |
| Cohabited | 10.57 | 89.43 |  | 0.35, (0.23 – 5.40) |  | 0.44, (0.09 – 2.24) |
| Widowed | 41.52 | 58.48 |  | 2.53, (0.08 -77.16) |  | 1.63, (0.02 - 147) |
| Divorced | 21.38 | 78.62 |  | 0.63, (0.27 - 1.52) |  | 0.54, (0.30 – 0.97) * |
| Separated | 17.26 | 82.74 |  | 0.48, (0.12 - 1.85) |  | 0.46, (0.19 - 1.12) |
|  | Occupational status of adolescents | Not working | 29.70 | 70.30 |  | 1.00 |  | 1.00 |
| Professional | 43.51 | 56.49 |  | 2.33, (0.74 -7.38) |  | 2.40, (0.76– 7.56) |
| Clerical | 23.67 | 76.33 |  | 1.08, (0.09 - 13.82) |  | 1.00, (0.08 – 13.35) |
| Sales | 16.13 | 83.87 |  | 0.57, (0.37 – 0.88) * |  | 0.60, (0.43 – 0.84) ** |
| Agri. employee | 31.49 | 68.51 |  | 0.82, (0.55 - 1.23) |  | 0.78, (0.60 - 1.03) |
| services | 24.47 | 75.53 |  | 0.66, (0.36 - 1.20) |  | 0.74, (0.47 - 1.17) |
| skilled manual | 17.89 | 82.11 |  | 0.52, (0.19- 1.38) |  | 0.56, (0.26 - 1.19) |
| Unskilled manual | 43.03 | 56.97 |  | 1.55, (0.56 – 4.28) |  | 1.50, (0.73 – 3.07) |
| Others | 33.05 | 66.95 |  | 1.08, (0.60– 1.96) |  | 1.06, (0.66 – 1.70) |
|  | Age of household head | 15 – 24 | 19.03 | 80.97 |  | 1.00 |  | 1.00 |
| 25 – 34 | 24.22 | 75.78 |  | 1.20, (0.60- 2.40) |  | 1.24, (0.79 – 1.95) |
| 35 – 44 | 35.34 | 64.66 |  | 1.79, (0.93 - 3.46) |  | 1.79, (1.13 - 2.83) * |
| 45 – 59 | 30.05 | 69.95 |  | 1.31, (0.68 - 2.52) |  | 1.27, (0.81 – 1.99) |
| ≥60 | 25.49 | 74.51 |  | 1.16, (0.59 - 2.28) |  | 1.16, (0.74 - 1.83) |
|  | Number of under five children in household | no <5 child | 25.91 | 74.09 |  | 1.00 |  | 1.00 |
| has at least one <5 child | 31.20 | 68.80 |  | 1.18, (0.85 - 1.66) |  | 1.13, (0.91- 1.42) |
|  | Number of household members | 1-2 | 21.91 | 78.09 |  | 1.00 |  | 1.00 |
| 3-5 | 26.88 | 73.12 |  | 0.82, (0.46 - 1.47) |  | 0.87, (0.58 – 1.31) |
| 6-7 | 29.39 | 70.61 |  | 0.87, (0.46 - 1.64) |  | 0.90, (0.57 – 1.41) |
| ≥7 | 31.10 | 68.90 |  | 0.91, (0.44 - 1.89) |  | 0.92, (0.56 – 1.49) |
|  | Time to get drinking water | < 30 minutes | 31.33 | 68.67 |  | 1.00 |  | 1.00 |
| ≥30 minutes | 29.46 | 70.54 |  | 0.81, (0.59 - 1.11) |  | 0.78, (0.63 – 0.97) * |
| Water on premises | 21.67 | 78.33 |  | 0.81, (0.45 - 1.49) |  | 0.97, (0.64– 1.47 |
| Others | 29.00 | 71.00 |  | 0.60, (0.21 - 1.69) |  | 0.50, (0.10- 2.37) |
|  | type of toilet facilities | Improved | 20.67 | 79.33 |  | 1.00 |  | 1.00 |
| Un-improved | 29.61 | 70.39 |  | 1.75, (1.13 - 2.72) * |  | 1.77, (1.24 - 2.53) * |
| Others | 31.91 | 68.09 |  | 4.13, (0.85 - 21.21) |  | 3.92 (0.70- 21.94) |
|  | frequency of  listening to radio | Not at all | 31.17 | 68.83 |  | 1.00 |  | 1.00 |
| less than once a week | 24.60 | 75.40 |  | 0.71, (0.51 - 0.99) * |  | 0.72, (0.56 – 0.93) * |
| at least once a week | 21.44 | 78.56 |  | 0.64, (0.43 - 0.96) * |  | 0.66 (0.50 - 0.87) ** |
|  | Wealth index | Poorest | 32.46 | 67.54 |  | 1.00 |  | 1.00 |
| Poorer | 26.61 | 73.39 |  | 0.62, (0.39 - 1.00) |  | 0.77, (0.55 - 1.09) |
| Middle | 35.33 | 64.67 |  | 1.04, (0.66 - 1.64) |  | 1.33, (0.94 – 1.88) |
| Richer | 29.14 | 70.86 |  | 0.77, (0.48 - 1.25) |  | 0.98, (0.68 - 1.40) |
| Richest | 21.76 | 78.24 |  | 0.73, (0.40 - 1.35) |  | 1.24, (0.78 – 1.96) |
|  | type of cooking fuel | electricity | 21.96 | 78.04 |  | 1.00 |  | 1.00 |
| lpg/natural gas/bio gas/ kerosene | 27.45 | 72.55 |  | 0.79, (0.23 - 2.70) |  | 0.78, (0.27 - 2.27) |
| Charcoal | 21.46 | 78.54 |  | 0.94, (0.55 - 1.61) |  | 0.83, (0.48- 1.43) |
| wood | 28.45 | 71.55 |  | 0.79, (0.45 - 1.36) |  | 0.79, (0.45 - 1.40) |
| straw/crop/animal dung | 37.23 | 62.77 |  | 1.13, (0.54 - 2.35) |  | 1.02, (0.53- 1.95) |
| Others | 29.61 | 70.39 |  | 0.51, (0.08 - 3.16) |  | 0.62, (0.07 – 5.81) |
| 1. Community level variables | | | | | | | | |
|  | Regions | Tigray | 43.31 | 56.69 |  |  | 1.00 | 1.00 |
| Afar | 42.99 | 57.01 |  |  | 1.07, (0.44 - 2.60) | 0.91, (0.34 - 2.42) |
| Amhara | 34.32 | 65.68 |  |  | 0.62, (0.43 -0.91) * | 0.53, (0.35 - 0.81) ** |
| Oromia | 26.58 | 73.42 |  |  | 0.45, (0.31 - 0.65) *** | 0.33, (0.21 - 0.53) *** |
| Somali | 45.14 | 54.86 |  |  | 1.12, (0.63 - 1.98) | 0.99, (0.50- 1.99) |
| Benishangul | 20.78 | 79.22 |  |  | 0.31, (0.12 - 0.84) * | 0.23, (0.08 - 0.65) ** |
| SNNPR | 17.37 | 82.63 |  |  | 0.24, (0.16 - 0.36) *** | 0.18, (0.10 - 0.30) *** |
| Gambela | 38.29 | 61.71 |  |  | 0.94, (0.21 - 4.30) | 0.69, (0.14 - 3.52) |
| Harari | 29.98 | 70.02 |  |  | 0.69, (0.11 - 4.11) | 0.57, (0.09 - 3.69) |
| Addis Ababa | 20.35 | 71.54 |  |  | 0.56, (0.32 - 0.97) * | 0.56, (0.29 – 1.07) |
| Dire-Dawa | 28.46 | 71.54 |  |  | 0.81, (0.25 - 2.55) | 0.83, (0.24– 2.89) |
|  | Place of residence | Urban | 19.51 | 80.49 |  |  | 1.00 | 1.00 |
| Rural | 30.86 | 69.14 |  |  | 2.34, (1.64 - 3.34) *** | 2.35, (1.41- 3.92) ** |
|  | Community adolescent girls ‘education | Lower | 29.68 | 70.32 |  |  | 1.00 | 1.00 |
| Middle | 27.76 | 72.24 |  |  | 1.12, (0.85 - 1.48) | 0.92, (0.66- 1.28) |
| Higher | 64.62 | 35.38 |  |  | 3.91, (0.00 - 11268) | 5.69, (0.00 – 3,4123) |
|  | Community unprotected drinking water source | Not big problem | 24.24 | 75.76 |  |  | 1.00 | 1.00 |
| Big problem | 28.22 | 71.78 |  |  | 1.13, (0.87 - 1.48) | 1.15, (0.87- 1.52) |
